# Supplementary material
Source: publisher figshare collection journal article supplement (https://acs.figshare.com/ndownloader/files/4030918)
Supplement: Supplementary file 1 [file 4030918]

# Supporting Information

## **A Water-Promoted Mechanism of Alcohol Oxidation on Au(111) Surface: Understanding toward the Catalytic Behavior of Bulk Gold**

Chun-Ran Chang,<sup>1</sup> Xiao-Feng Yang,<sup>1,2</sup> Bo Long,<sup>1</sup> and Jun Li<sup>1\*</sup>

<sup>1</sup> Department of Chemistry and Key Laboratory of Organic Optoelectronics and Molecular Engineering of Ministry of Education, Tsinghua University, Beijing 100084, China

<sup>2</sup> State Key Laboratory of Catalysis, Dalian Institute of Chemical Physics, Chinese Academy of Sciences, 457 Zhongshan Road, Dalian 116023, China

\* To whom correspondence should be addressed. E-mail: junli@mail.tsinghua.edu.cn

**Table S1. Calculated Adsorption Energy ( $E_{\text{ad}}$ ) of the Key Species on Au(111) Surface Using Different  $k$ -points**

| Species            | $E_{\text{ad}} (3 \times 3 \times 1) / \text{eV}^a$ | $E_{\text{ad}} (7 \times 7 \times 1) / \text{eV}^b$ | $ E_{\text{ad}}  / \text{eV}^c$ |
|--------------------|-----------------------------------------------------|-----------------------------------------------------|---------------------------------|
| CH <sub>3</sub> OH | −0.17                                               | −0.16                                               | 0.01                            |
| CH <sub>3</sub> O  | −0.79                                               | −0.87                                               | 0.08                            |
| CH <sub>2</sub> O  | −0.06                                               | −0.06                                               | 0.00                            |
| O                  | −2.64                                               | −2.73                                               | 0.09                            |
| OH                 | −1.54                                               | −1.61                                               | 0.07                            |
| OOH                | −0.24                                               | −0.30                                               | 0.06                            |

<sup>a</sup> Adsorption energy obtained using  $3 \times 3 \times 1$   $k$ -point. <sup>b</sup> Adsorption energy obtained using  $7 \times 7 \times 1$   $k$ -point. <sup>c</sup> The difference between  $E_{\text{ad}} (3 \times 3 \times 1)$  and  $E_{\text{ad}} (7 \times 7 \times 1)$ , in absolute value.

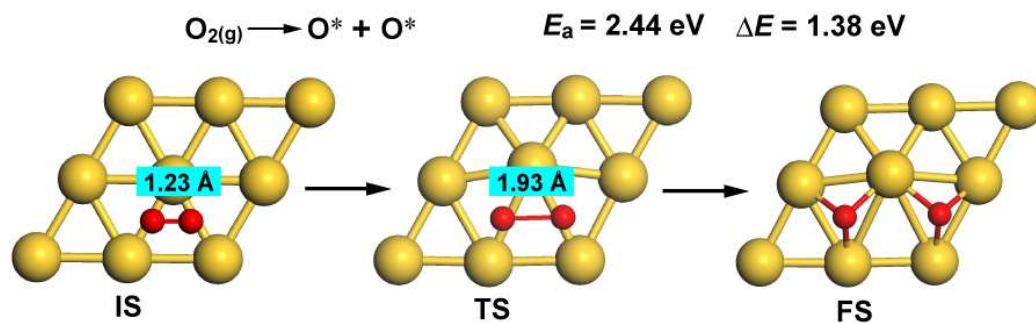

**Figure S1.** The dissociation of molecular oxygen on Au(111) surface.

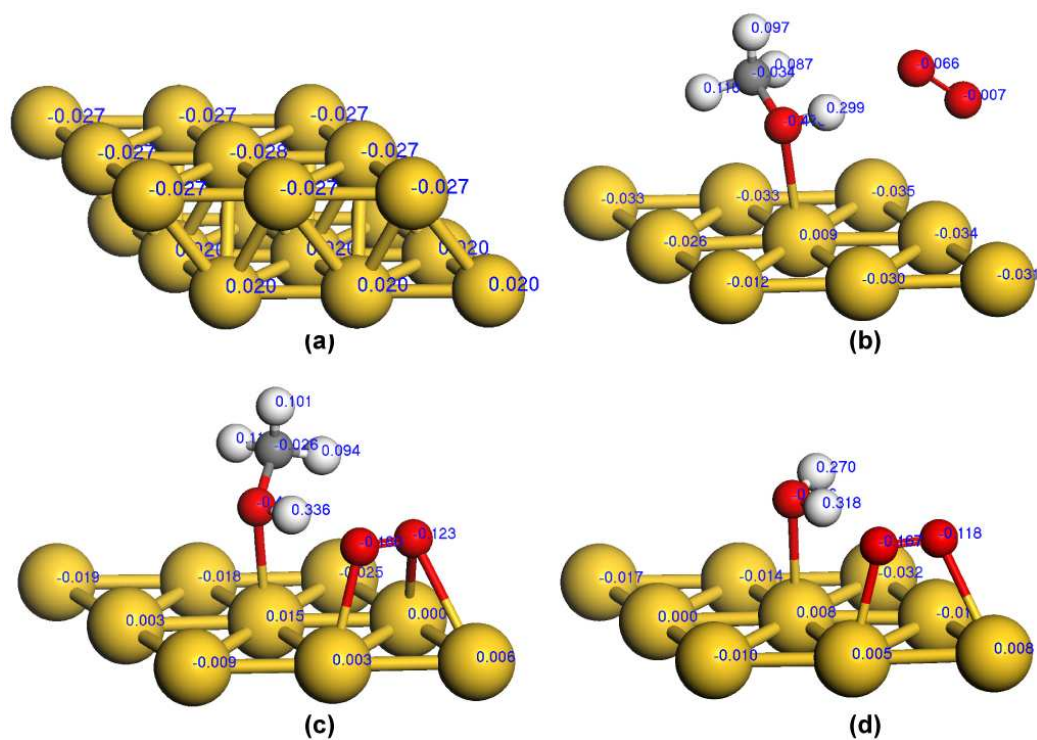

**Figure S2.** Mulliken charge distribution on selected models. (a) top-two layers of Au(111) surface. (b) adsorbed  $\text{CH}_3\text{OH}$  and gas phase  $\text{O}_2$ . (c) co-adsorbed  $\text{CH}_3\text{OH}$  and  $\text{O}_2$ . (d) co-adsorbed  $\text{H}_2\text{O}$  and  $\text{O}_2$ .

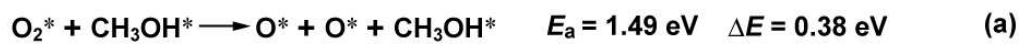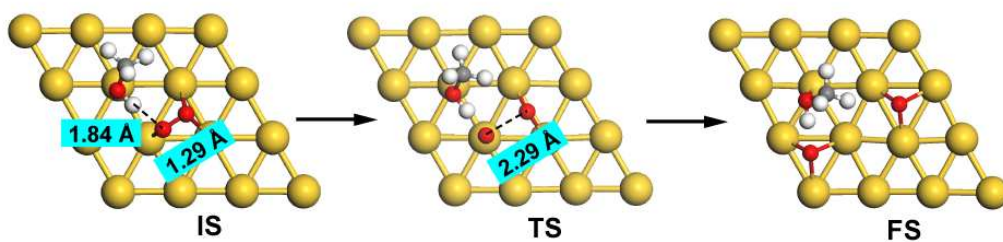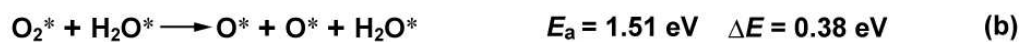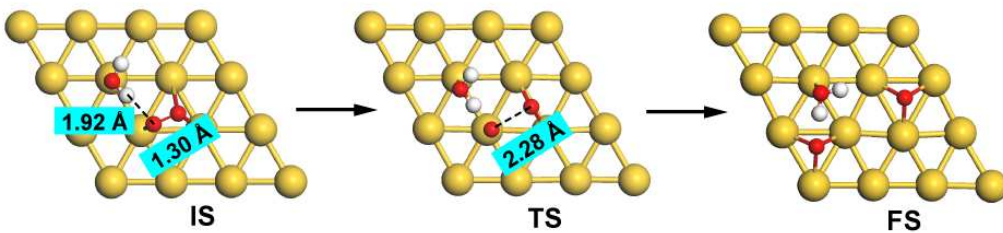

**Figure S3.** The dissociation of molecular oxygen in the presence of neighboring  $\text{CH}_3\text{OH}$  (a) and  $\text{H}_2\text{O}$  (b) on  $\text{Au}(111)$  surface.

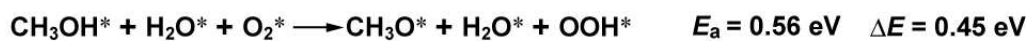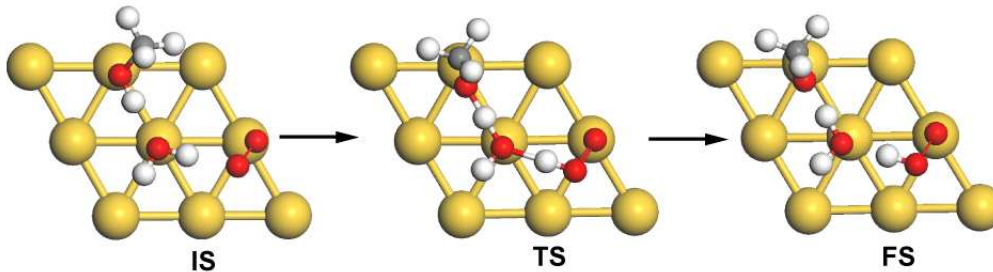

**Figure S4.** The formation of  $\text{OOH}$  with a  $\text{H}_2\text{O}$  molecule locating in the middle of  $\text{CH}_3\text{OH}$  and  $\text{O}_2$ .

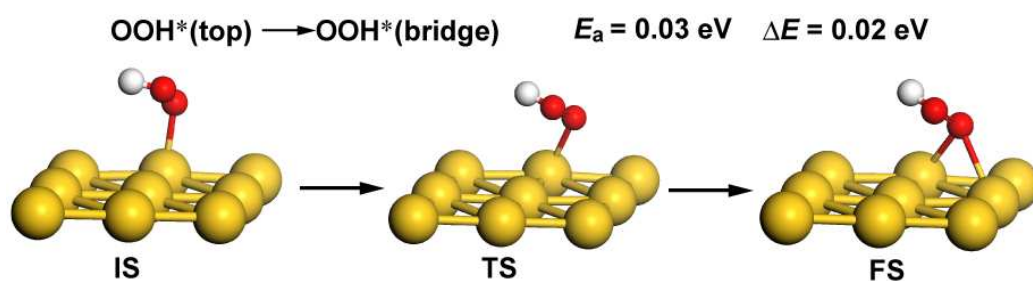

**Figure S5.** The diffusion of OOH\* from top to bridge site on Au(111) surface.

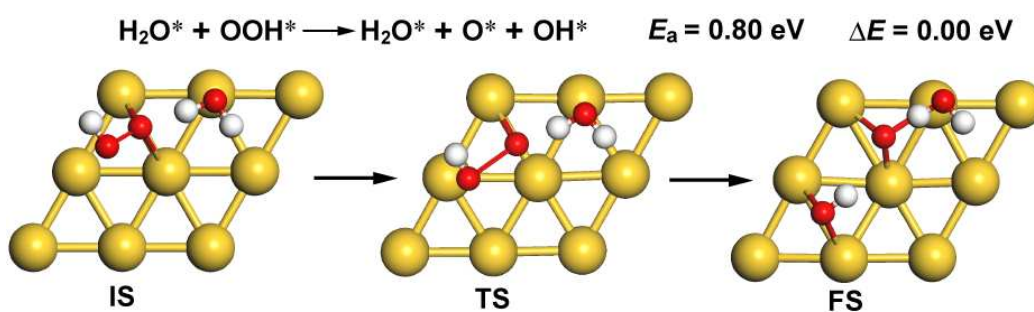

**Figure S6.** The dissociation of \*OOH in the presence of neighboring H<sub>2</sub>O on Au(111) surface.

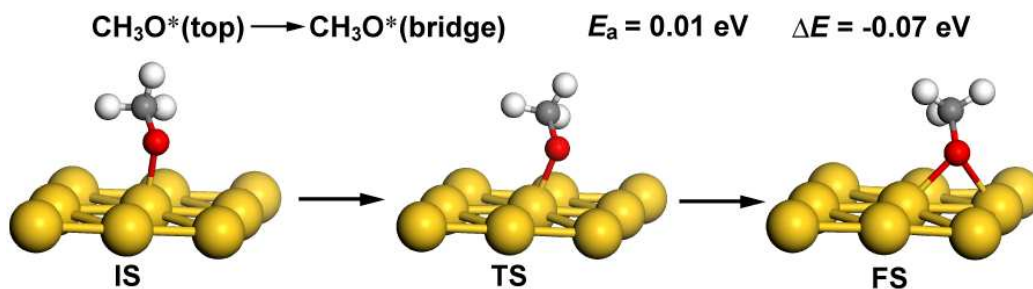

**Figure S7.** The diffusion of CH<sub>3</sub>O\* from top to bridge site on Au(111) surface.
